# Supplementary material
Source: MDPI journal article supplement (https://www.mdpi.com/2071-1050/13/4/2236)
Supplement: s1 [file s1]

Section 1

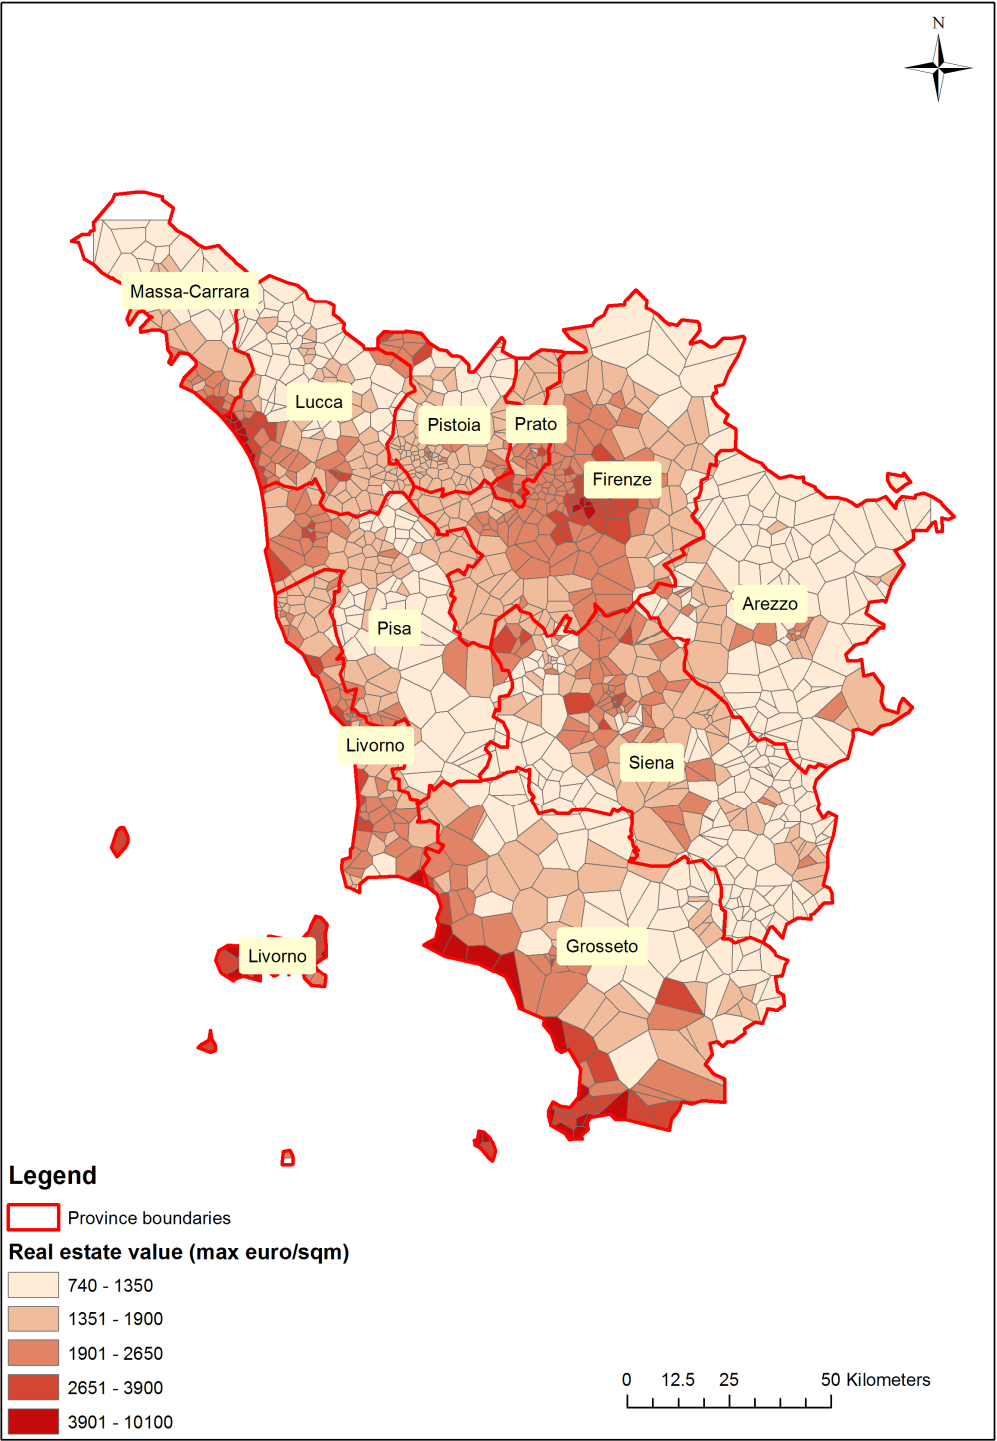

Figure S1. OMI values attributed to Voronoi tessellations.

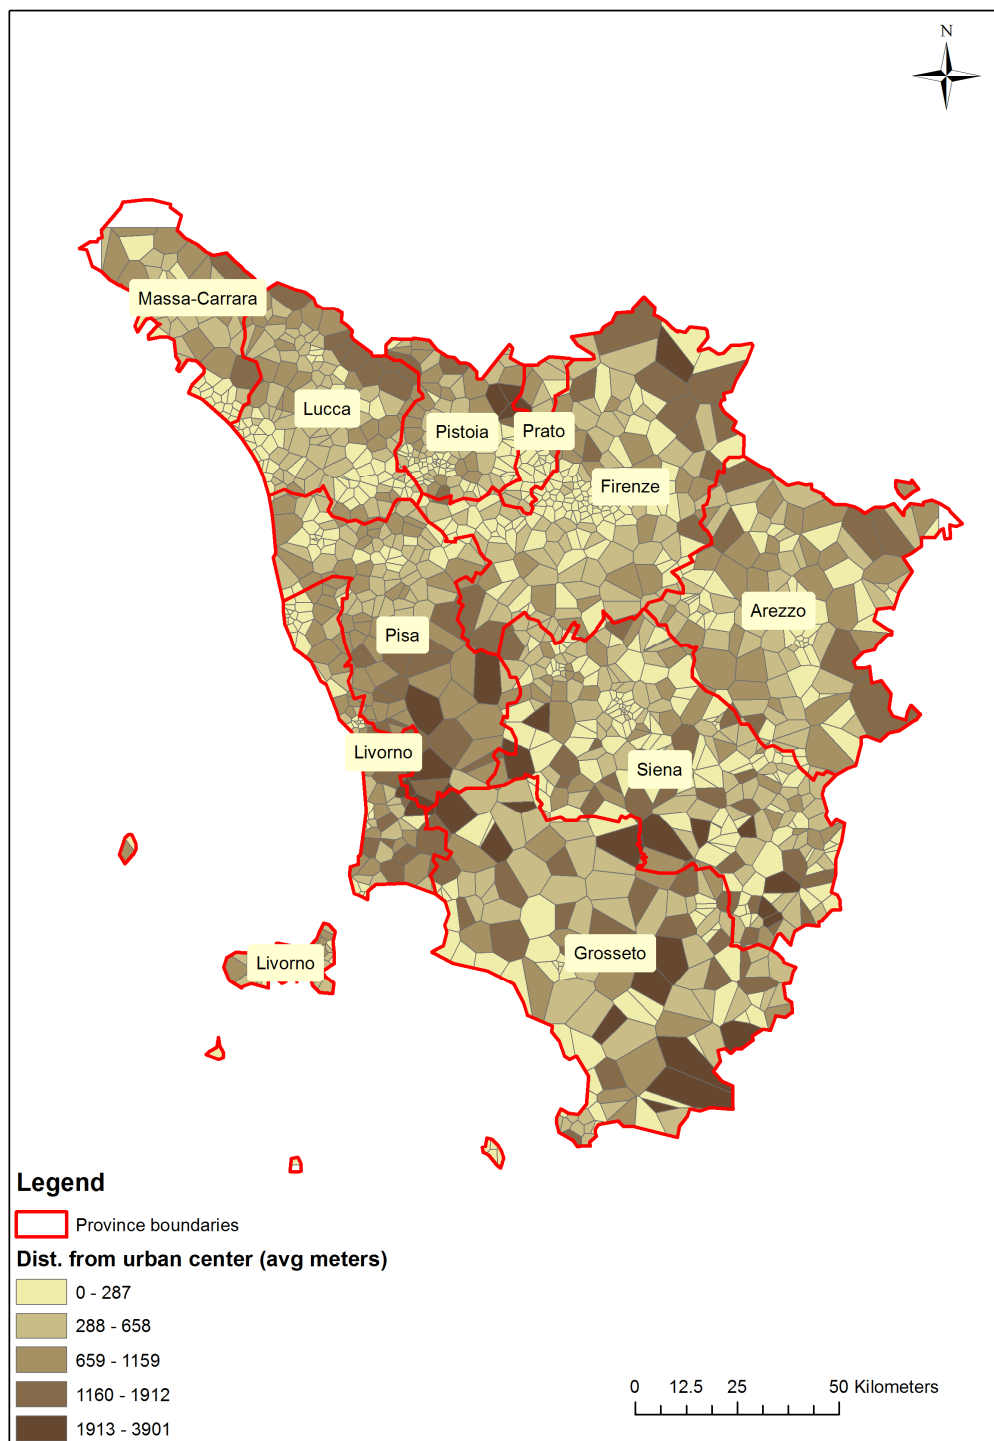

**Figure S2.** Average distances from urban center attributed to Voronoi tessellations.

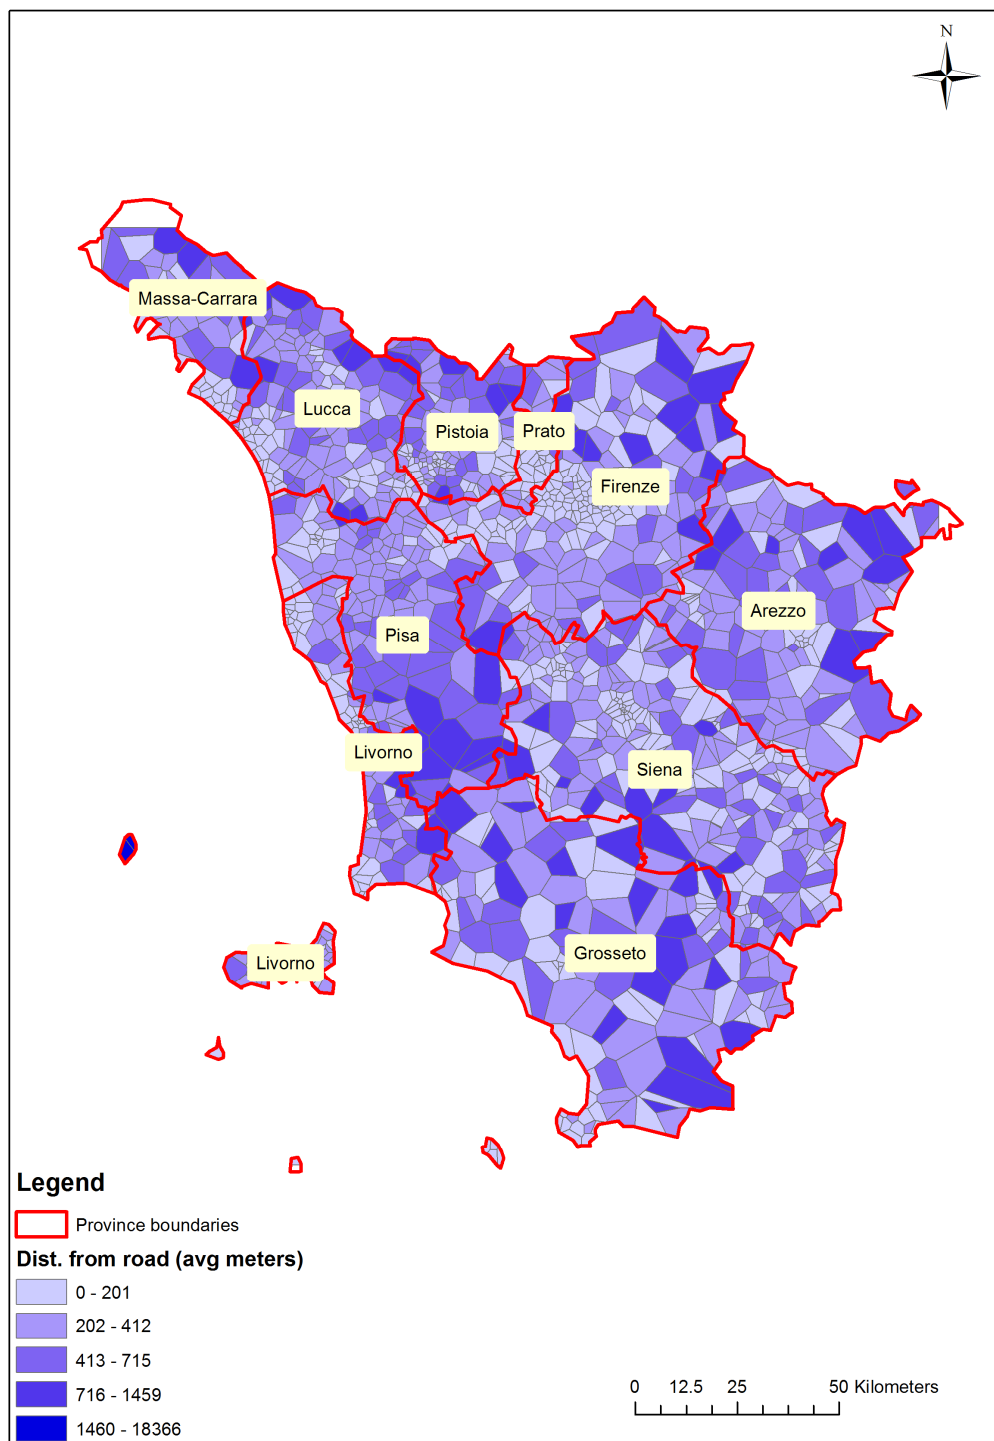

**Figure S3.** Average distances from roads attributed to Voronoi tessellations.

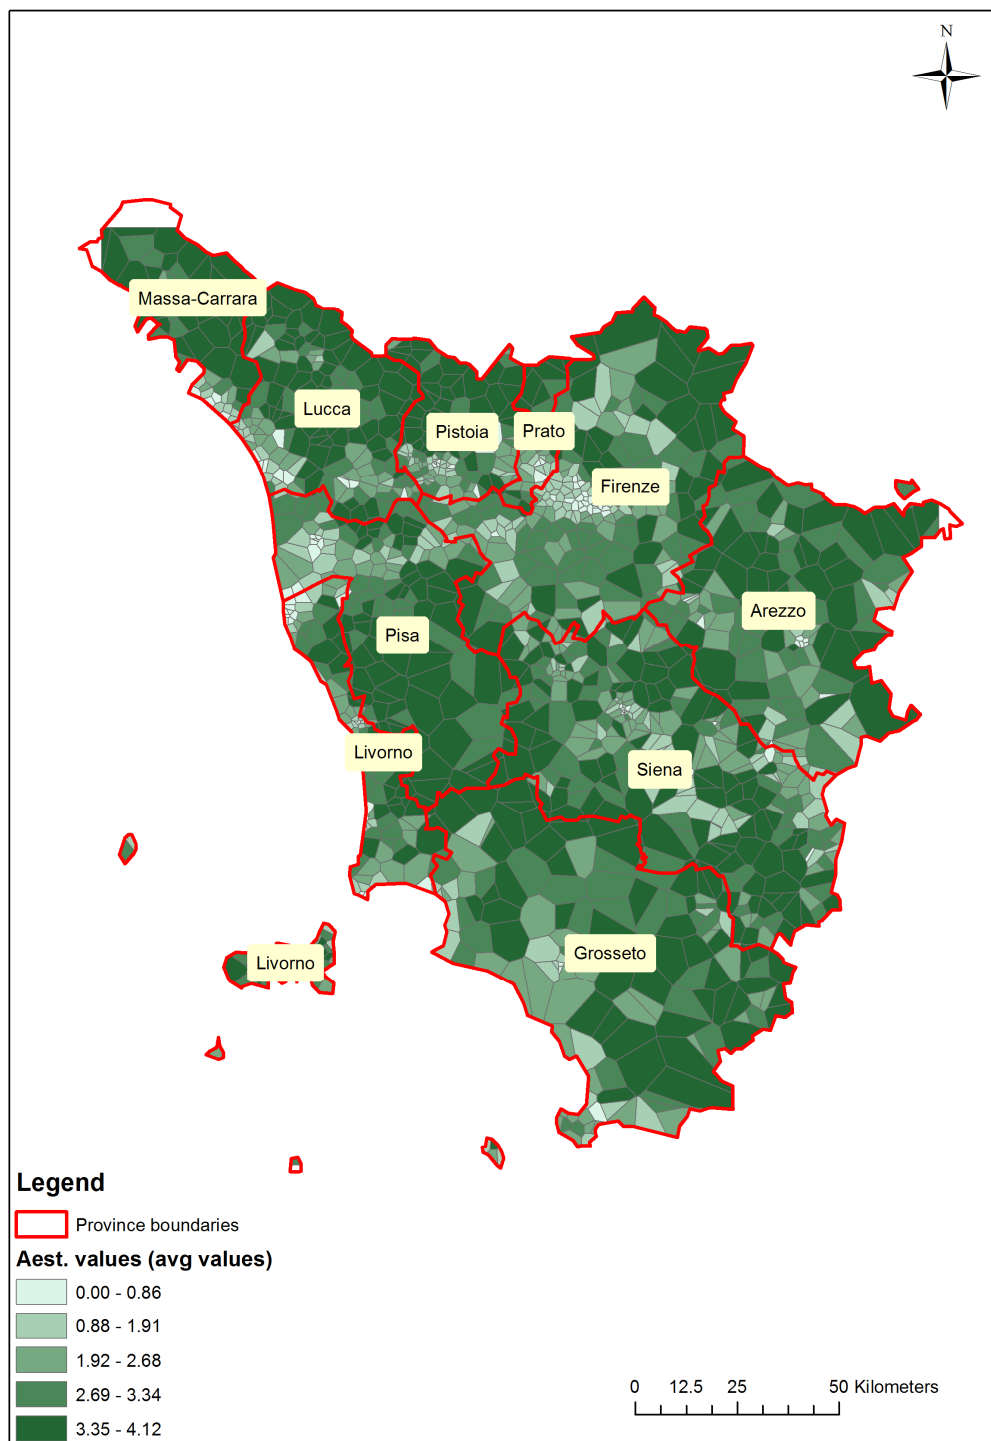

**Figure S4.** Average aesthetic values attributed to Voronoi tessellations.

Section 2

These are the maps that explain the Univariate Local Geary analysis for the four variables considered.

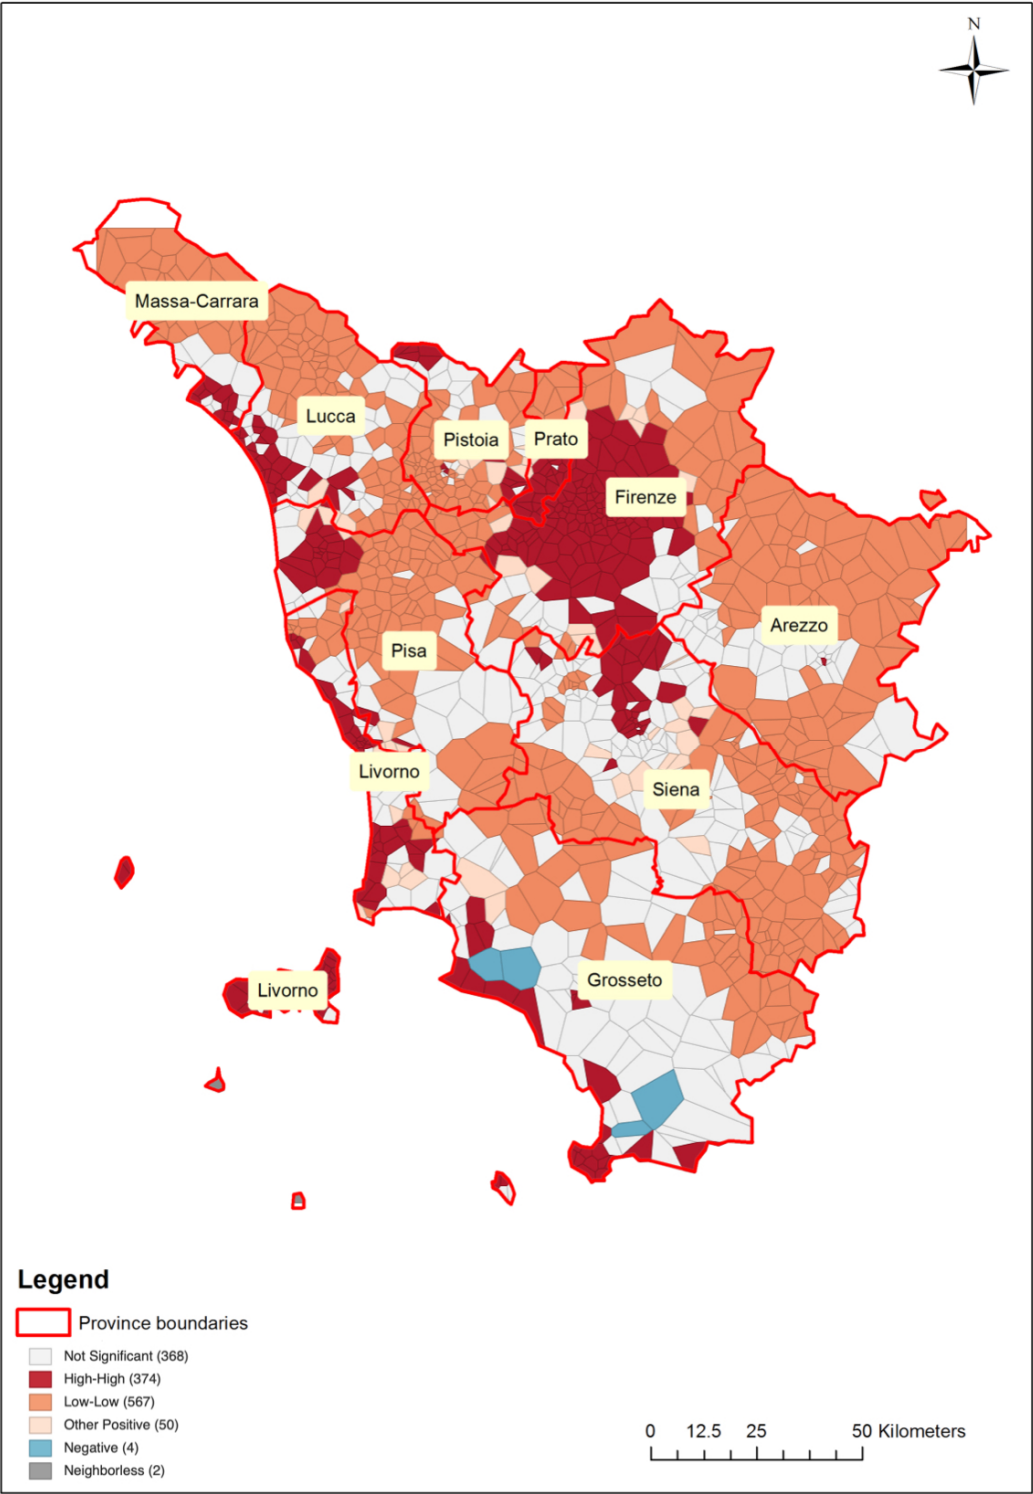

Figure S5. OMI values cluster map.

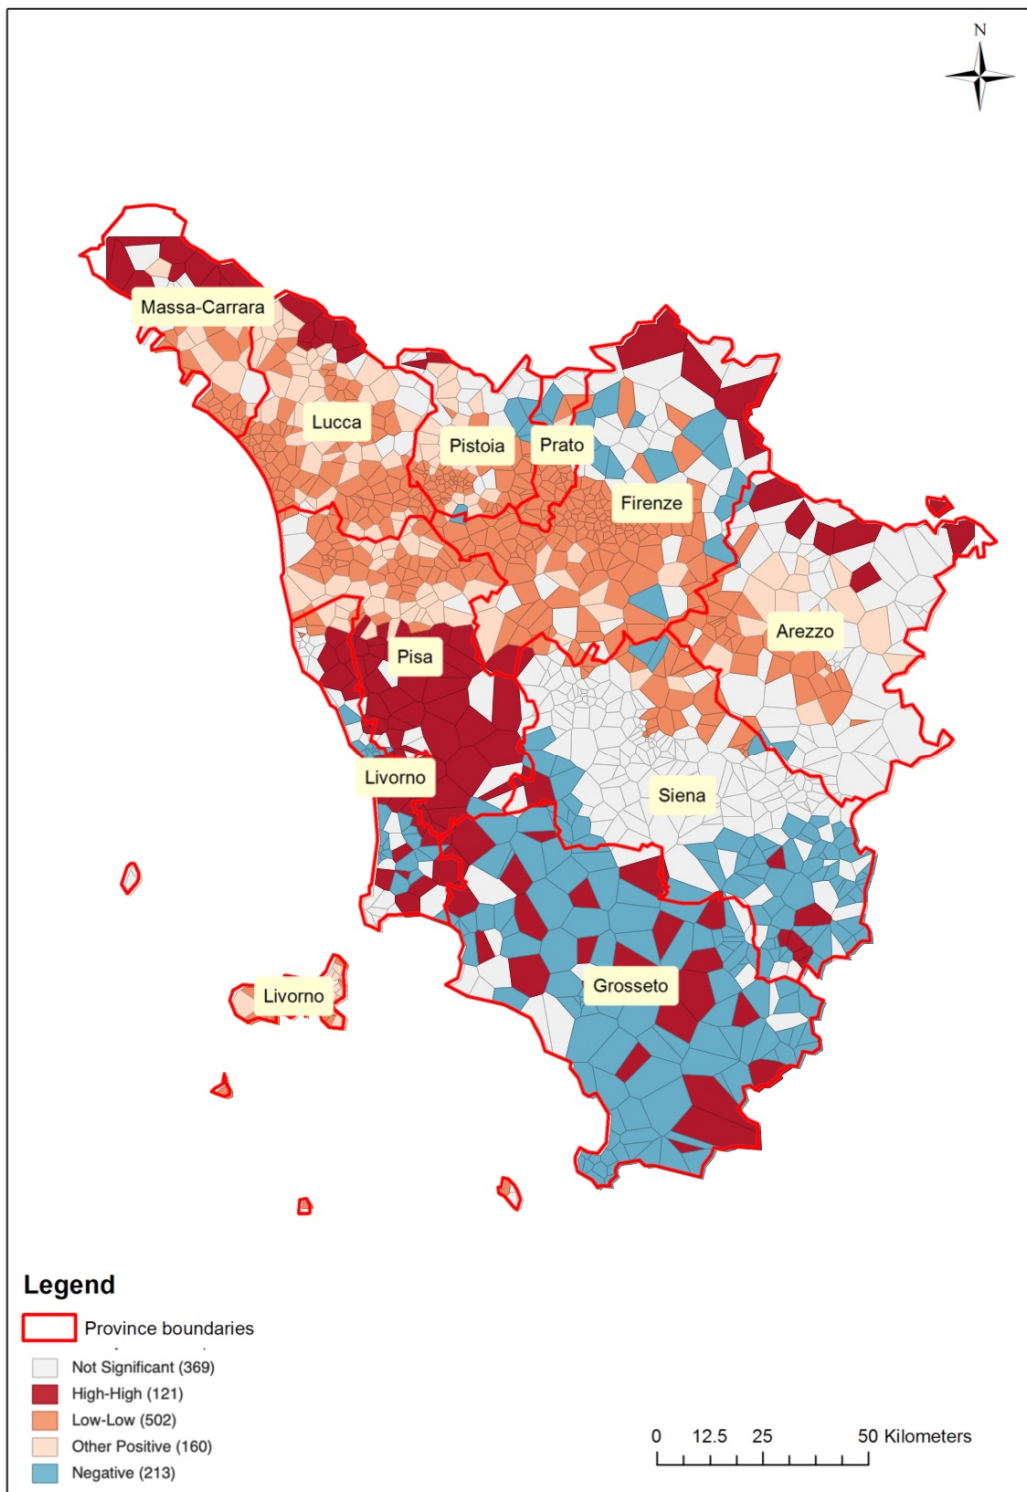

**Figure S6.** Distance from inhabited center cluster map.



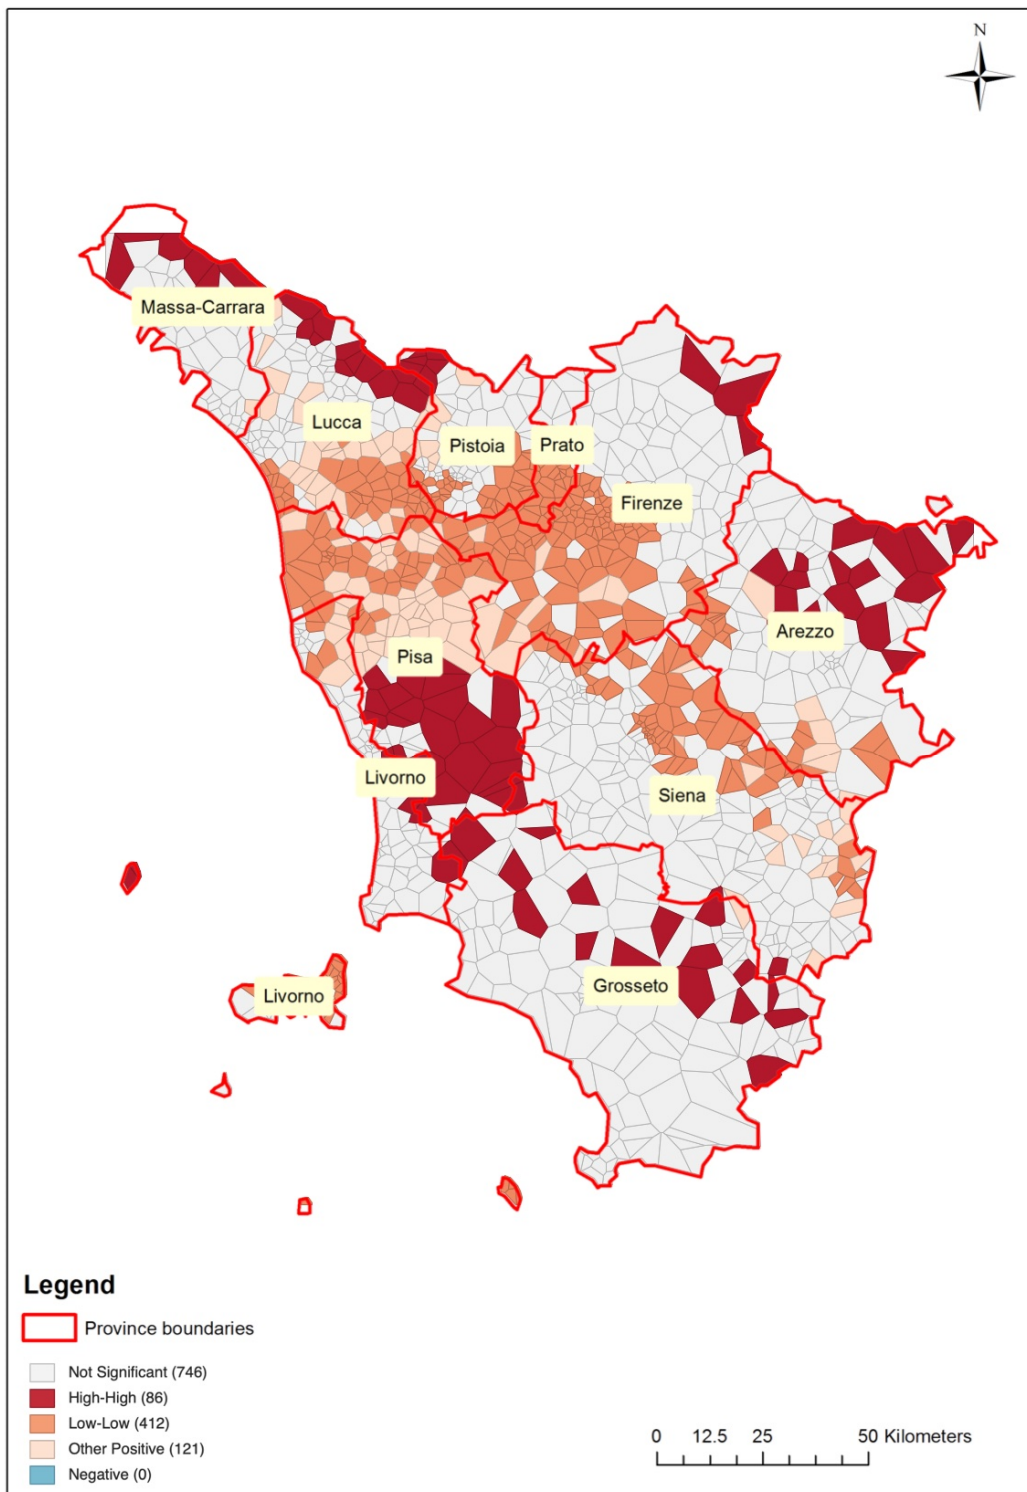

**Figure S7.** Distance from roads cluster map.

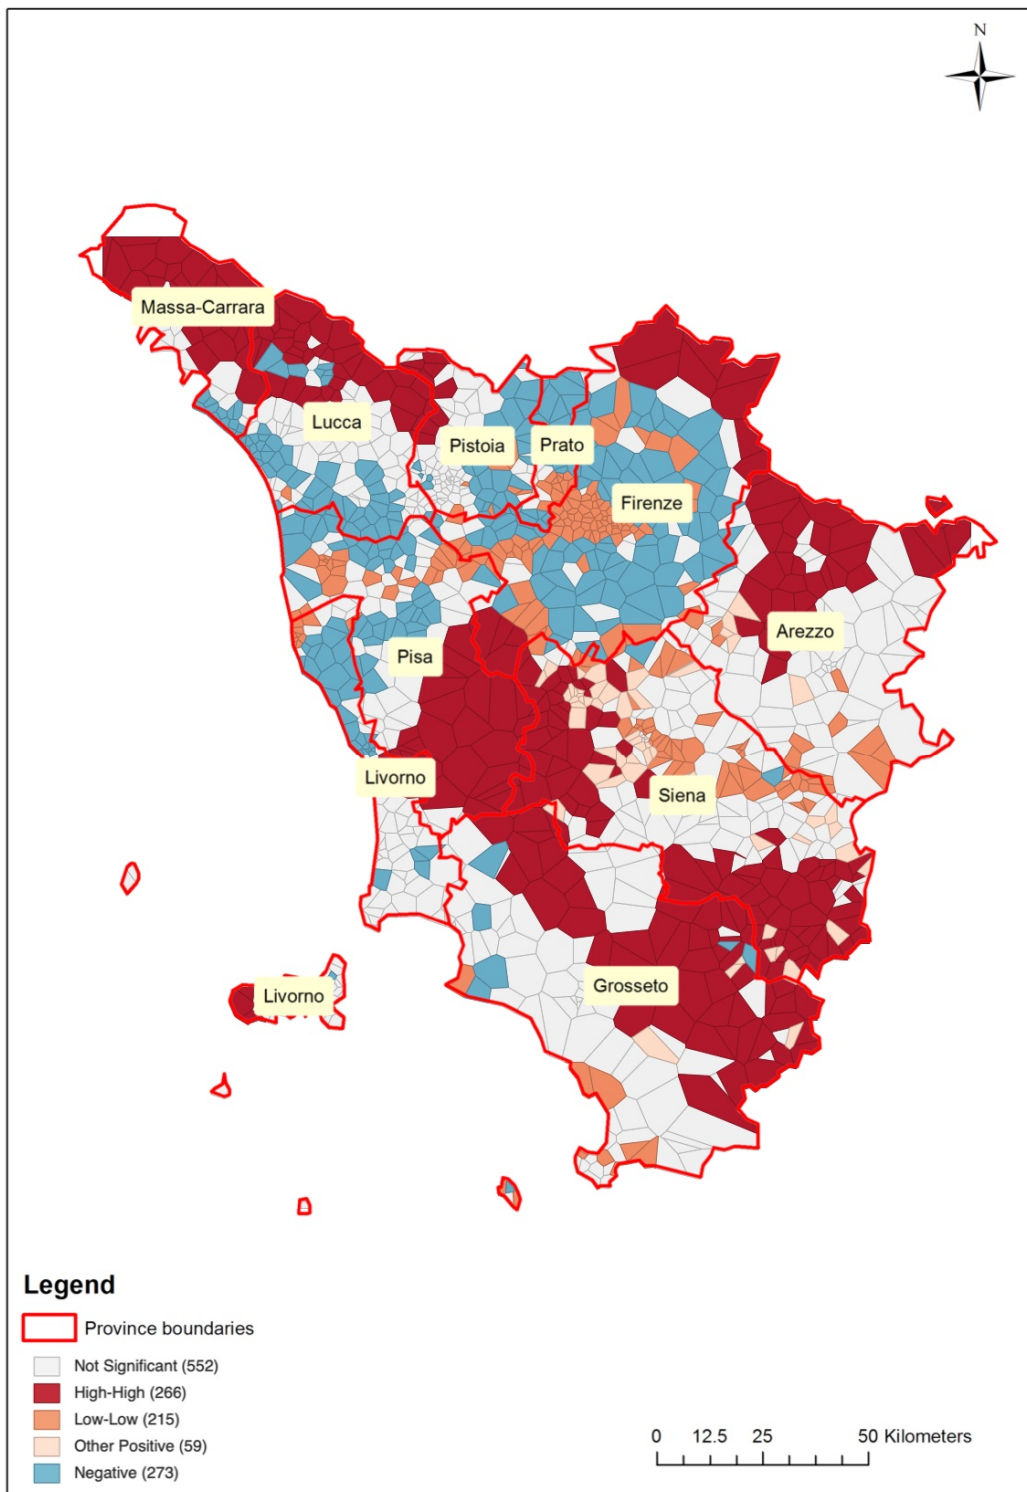

**Figure S8.** Aesthetic values cluster map.
